# Supplementary material for: The Fingerprint of Climate Variability on the Surface Ocean Cycling of Iron and its Isotopes
Source: Copernicus journal article supplement (doi:10.5194/bg-2022-241), 2023-01-02
Supplement: Supplementary file [file bg-2022-241-AC1-supplement.pdf]

This paper discusses the use of iron isotope ratios as a signal of climate change, based on simulations using a model of ocean biogeochemical cycles that includes iron isotope. The authors point out the possibility that changes in the iron cycle associated with ENSO and the global warming can be detected as changes in iron isotope ratios and that iron isotope ratios can be utilized as an indicator of iron limitation, and recommend that regular time series observations be conducted. In addition, the paper discusses possibilities of not being able to detect iron isotope signals when positive and negative anomalies are offset or when isotope ratios in the endmembers are not deviate significantly in the background values. The text is concise and clear, and the analysis is carefully presented. Overall, the paper provides useful insights; thus I recommend to accept this manuscript after minor revision. There are a few points that I have questions about, which are described below. It would be desirable to answer these points and revise the text if necessary.

In the equatorial Pacific, as the authors mentioned, the equatorial undercurrent (EUC), which is a sub-surface flow, transports iron from west to east (e.g. Slemons et al., 2010, GBC), and this iron is thought to be supplied to the surface layer as well. Does this model reproduce well the transport of iron by EUC? Although analysis of this study is limited to the surface layer down to 10 m, the iron cycle in the surface layer is also controlled by the distribution of iron in the sub-surface layer and may be particularly important in the tropical Pacific. Describing how the model can reproduce iron transport by EUC strengthens the reliability of the model results.

We agree that upwelling of iron from sub-surface layers is also important for the distribution of surface ocean iron because the iron transported by the EUC is an additional source to the surface. The average dFe distribution around the equator in our hindcast simulation is similar to the “control” simulation presented by Slemons et al. (2009), which does not include additional Fe sources in the western Pacific but agrees better with biogeochemical data (chl, NO<sub>3</sub>) in the eastern equatorial Pacific. Moreover, the elevated dFe within the EUC ‘core’ along 140°W of around ~1nM in the Slemons paper simulations that included an enhanced deep source to the EUC appear to be strongly overestimated, relative to other data. To illustrate this, and to compare the hindcast simulation to the available data in this region, we plotted dFe data from Slemons et al. (2009, 2010) and other studies (Coale et al., 1996; Fitzwater et al., 1996; Kondo et al., 2012; Mackey et al., 2002; Wu et al., 2010; Kaupp et al. 2011) on top of model outputs along the equator (0-300m) and at 140°W (2°S to 10°N), similar to Figures 3 and 4 in Slemons et al. (2009):

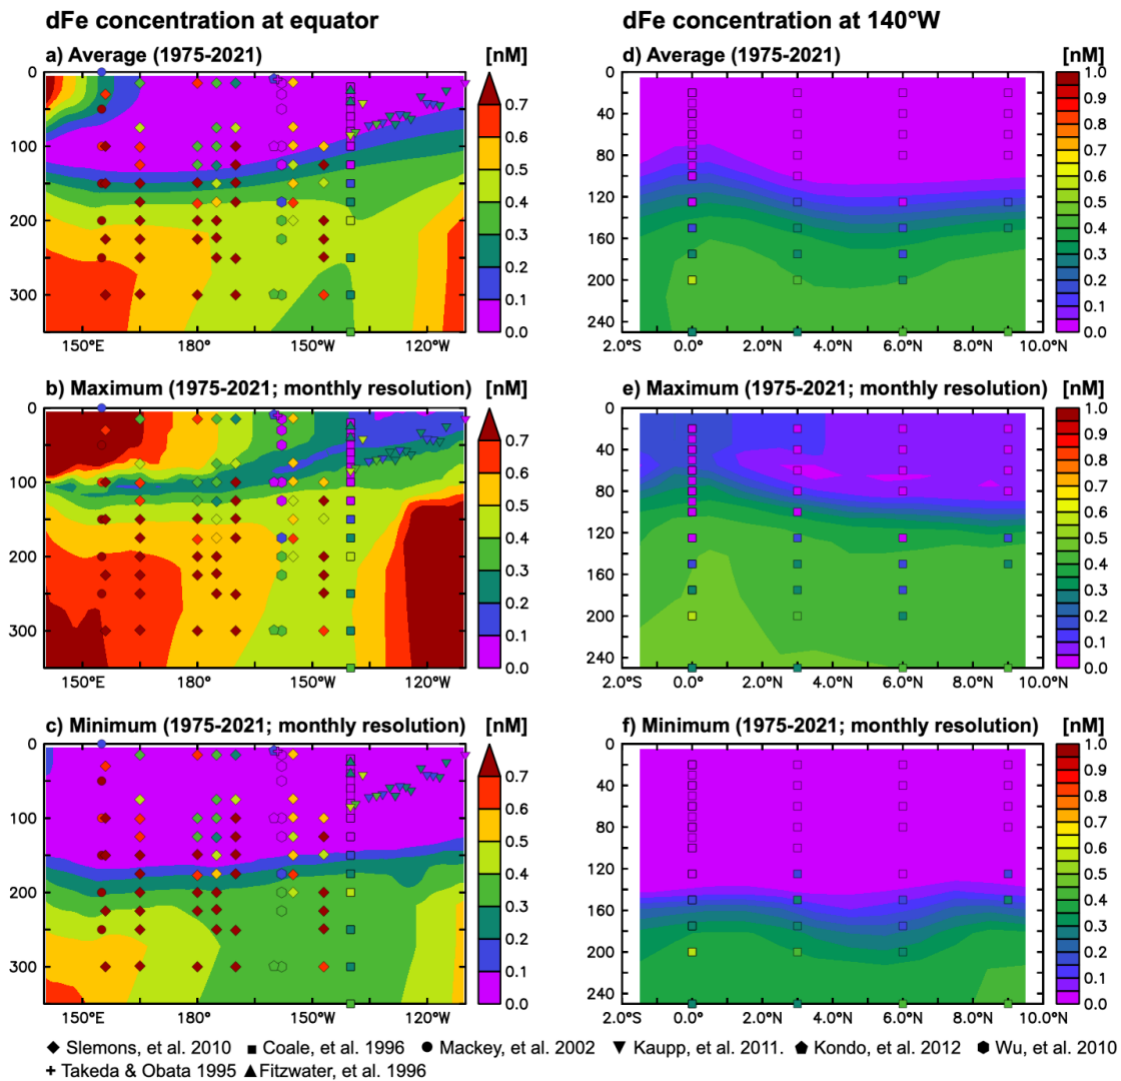

While our model does a good job in reproducing data along 140°W, we may underestimate dFe concentrations within the EUC in the western tropical Pacific (although we note there is a lot of variability across studies). We will add a comment in the discussion (Section 4.1) to introduce this caveat and include this figure in the supplement:

“Also, the sedimentary Fe supply from the PNG region to the equatorial undercurrent (EUC) may be underestimated in our model compared to some of the available regional observations (but not all, Figure SX). As the EUC supplies Fe to the surface ocean (e.g., Coale, et al 1996, Kaupp, et al. 2011), this may cause additional impacts on surface ocean dFe concentrations and their response to climate variability (Fig. 5d), as well as on the response in  $\delta^{56}\text{Fe}_{\text{EM}}$  and, consequently,  $\delta^{56}\text{Fe}_{\text{diss}}$ .”

I understand that the positive iron isotope anomaly around 40S in the South Pacific (Fig. 1b) is due to strong uptake fractionation effects (Fig. S1d). I, however, do not understand why the uptake fractionation effects are stronger in this region. Adding supplementary explanations will help readers' understanding.

The explanation of this feature is discussed around line 395 in the original manuscript:

“..the water in southeast Pacific originates in the (seasonally) Fe limited Southern Ocean and therefore contains Fe with relatively heavy  $\delta^{56}\text{Fe}_{\text{diss}}$  (Fig. S9). Here, the heavy  $\delta^{56}\text{Fe}_{\text{diss}}$  may therefore not only be caused by local processes but could instead be a “legacy” signature. It may also indicate that this dFe has been continuously recycled on its way to the southeast Pacific, which would leave dFe isotopically heavy, with the uptake fractionation parametrisation of our model, since parts of the produced (isotopically lighter) phytoplankton Fe are eventually removed from the surface ocean via particle settling.”

We agree that this should be mentioned/referred to in the discussion of Figure 1 and are planning to revise the manuscript as follows (line 157 in original manuscript):

“The elevated  $\delta^{56}\text{Fe}_{\text{diss}}$  SD at around 40°S is caused by horizontal shifts of areas with heavy  $\delta^{56}\text{Fe}_{\text{diss}}$  caused by strong (accumulated) uptake fractionation effects (Fig. 1c, Fig. S1d), as discussed in Section 4.2.

For the hindcast simulation, there are no figures regarding the basic quantities (e.g., distribution of primary production, dissolved iron concentration and the isotope ratios, etc.). The standard deviation of the interannual variation of iron isotope ratios is suddenly shown as the first figure. I think that showing the figures for the basic quantities first will help the readers' understanding of the model results and authors' arguments. It should be noted that the most readers have no prior knowledge about the characterisity of this model.

Figure 1b included the average iron isotopic signature for the hindcast simulation, average values for iron limitation and iron uptake as a fraction of dFe are included in Figure S9. However, we did not include figures of all modelled tracers and fluxes. To respond to the reviewers suggestion, we will add another supplementary figure presenting average and standard deviations for dissolved Fe and primary production, which will be referred to in section 3.1.1:

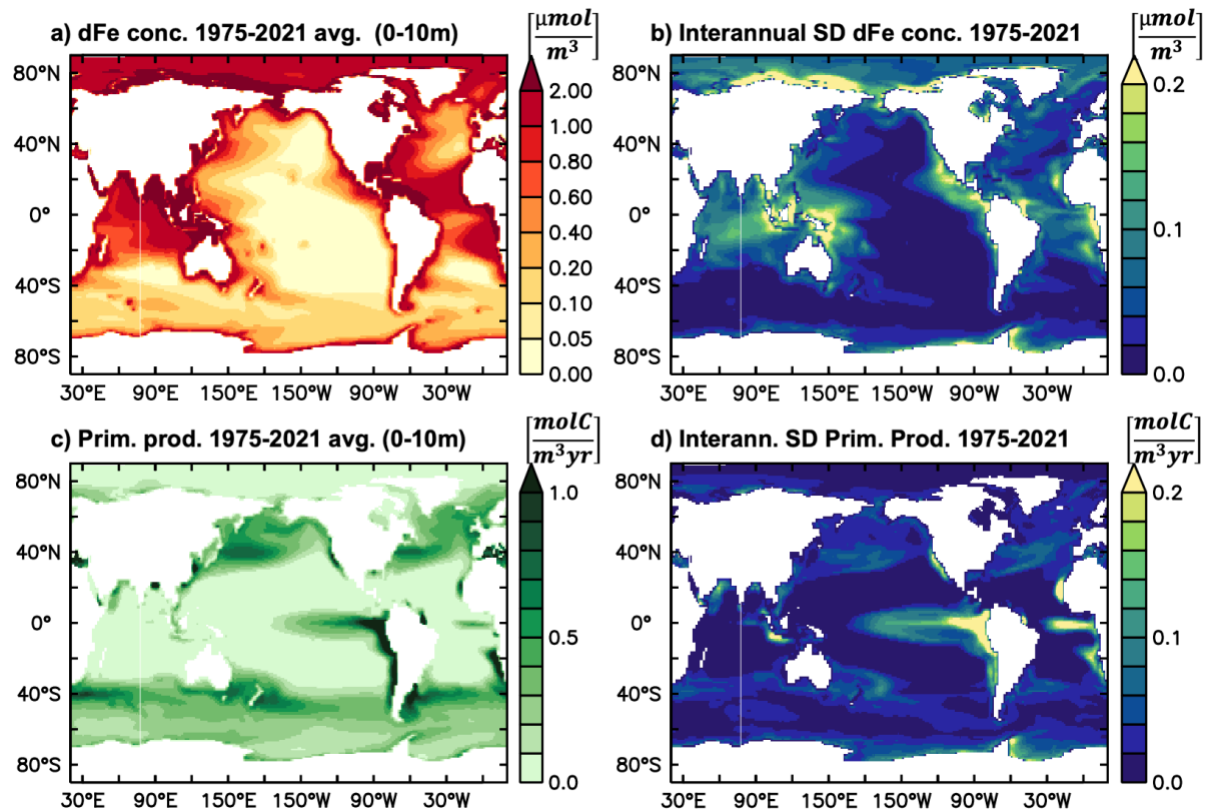

If regular observations of iron isotope ratio were possible, the obtained data would be time series data at a certain station. The authors could strengthen their arguments if they select one station from the model results, as an example, and show how the use of iron isotopic ratio helps to explain interannual variations of dissolved iron concentration.

The goal of this paper was not necessarily to design new time-series, but instead to examine the interannual variability in iron and iron isotope cycling. The comment about time series observations in this paper at the end of the 'wider implications' section (lines 418 onwards) was to indicate the potential usefulness of regular Fe isotope measurements in areas of (intermittent) Fe limitation, especially on seasonal scales. We chose not to include time series plot at any particular stations, since *interannual* variability at traditional time series stations (e.g., SOTS, BATS, HOT, PAPA) is relatively low compared to areas such as the equatorial Pacific presented in Figures 3-5:

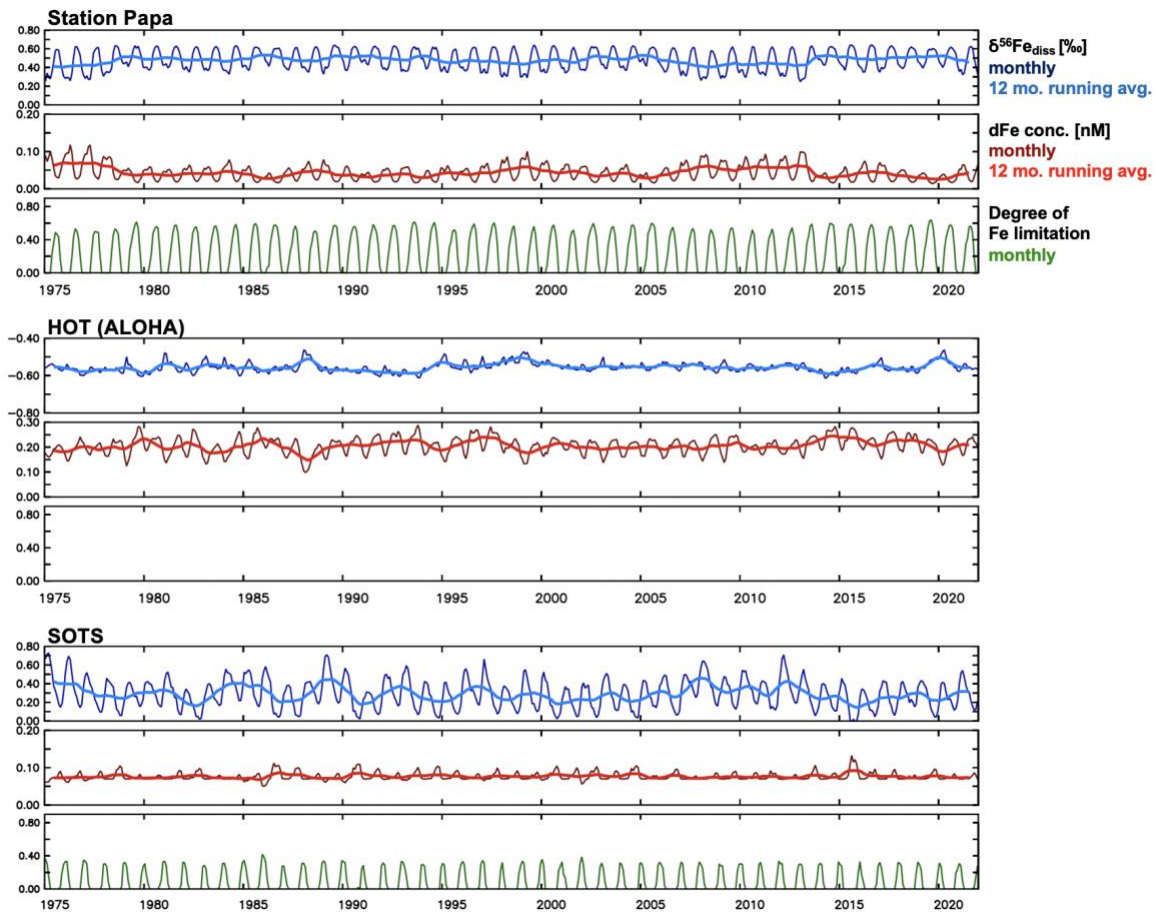

Instead, we have decided to amend this text to refer back to the model results explicitly, so that readers can consider other time series locations, including sites for potential new studies.

New text (l. 425 of original manuscript):

“Here, our model predicts substantial seasonal variability in surface ocean  $\delta^{56}\text{Fe}_{\text{diss}}$  (between ca. 0.1 to 0.7‰, Figure 1a), whereby available observations are within this range (Barrett et al., 2021; Ellwood et al., 2020). Moreover, based on predicted present and future variability in Fe limitation and, consequently,  $\delta^{56}\text{Fe}_{\text{diss}}$  in our model (Fig. 1-2), the equatorial and south eastern Pacific could be potential locations for future studies that explored the interannual changes in iron limitation.”

The following are really minor comments.

In Table 1, a case of "Hindcast neuSED" is mentioned, but the result is not presented as a figure in the main text. Since the description of this case in the text (L. 356) is enough understandable regarding the model setting, there is no need to list it as a case in Table 1. In addition, in the "d56Fe endmembers" column of the "Hindcast neuSED" case, there is description of "Sediments: -1 per mill," which may be a mistake of "0 per mill".

Will be updated.

I think the abbreviation ONI in line 202 stands for Ocean Nino Index, so it should be written as (dark red, Ocean Nino Index; ONI).

Will be updated.

In line 221, there is a description of "d56FeEM and d56FeUF (Fig. 1)". I think there is no need to refer "Fig. 1" here because d56FeEM and d56FeUF are clearly defined in Equations (1) and (3).

Will be updated.

Observations of iron isotopic ratios are currently very restricted, especially with little known about interannual variability, and it will be a long time before the findings of this study are validated. Seasonal variations in dissolved iron have been shown in several studies, I felt that it would have been easier and more useful to use this isotope model to evaluate the factors that cause seasonal variations of dissolved iron concentrations. I am looking forward to seeing such a study in future.

We agree with the reviewer that studying the drivers of seasonal variability in dFe concentration and signatures would be worthwhile, but unfortunately beyond the scope of this study. We are planning work in this area in the future.
